# Supplementary material for: HTLV-1 bZIP factor suppresses TDP1 expression through inhibition of NRF-1 in adult T-cell leukemia
Source: PubMed Central journal article supplement (PMC5634466; doi:10.1038/s41598-017-12924-0), 2017-10-09
Supplement: 41598_2017_12924_MOESM1_ESM.pdf [file 41598_2017_12924_MOESM1_ESM.pdf]

1 **HTLV-1 bZIP factor suppresses TDP1 expression through inhibition of NRF-1 in**  
2 **adult T-cell leukemia**

3  
4 Yoko Takiuchi<sup>1</sup>, Masayuki Kobayashi<sup>1,\*</sup>, Kohei Tada<sup>1</sup>, Fumie Iwai<sup>1</sup>, Maki Sakurada<sup>1</sup>,  
5 Shigeki Hirabayashi<sup>1</sup>, Kayoko Nagata<sup>1</sup>, Kotaro Shirakawa<sup>1</sup>, Keisuke Shindo<sup>1</sup>, Jun-  
6 ichirou Yasunaga<sup>2</sup>, Yasuhiro Murakawa<sup>3</sup>, Vinodh Rajapakse<sup>4</sup>, Yves Pommier<sup>4</sup>, Masao  
7 Matsuoka<sup>5</sup> and Akifumi Takaori-Kondo<sup>1</sup>

8  
9 <sup>1</sup>Department of Hematology and Oncology, Graduate School of Medicine, Kyoto  
10 University, 54 Shogoin-kawaracho, Sakyo-ku, Kyoto 606-8507, JAPAN

11 <sup>2</sup>Laboratory of Virus Control, Institute for Frontier Life and Medical Sciences, Kyoto  
12 University, 53 Shogoin-kawaracho, Sakyo-ku, Kyoto 606-8507, JAPAN

13 <sup>3</sup>RIKEN Preventive Medicine and Diagnosis Innovation Program, 1-7-22 Suehiro-cho,  
14 Tsurumi-ku, Yokohama, Kanagawa, 230-0045, JAPAN

15 <sup>4</sup>Developmental Therapeutics Branch and Laboratory of Molecular Pharmacology,  
16 Center for Cancer Research, National Cancer Institute, National Institutes of Health,  
17 Bethesda, MD 20892, USA

18 <sup>5</sup>Department of Hematology, Rheumatology and Infectious Disease, Kumamoto  
19 University Graduate School of Medicine, 1-1-1 Honjo, Kumamoto 860-8556, JAPAN

1 **Supplementary Figure and Figure Legend**

2

Supplementary Figure S1

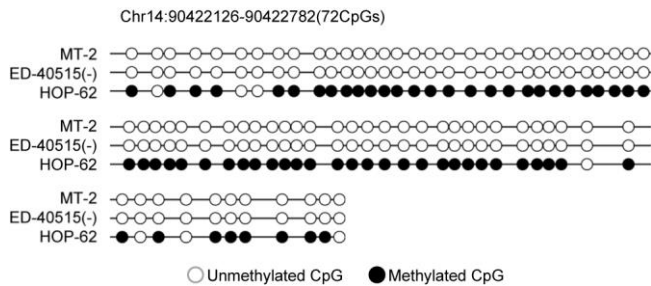

3

4 Supplementary Figure S1. DNA methylation in the promoter region of the *TDP1* gene  
5 in HTLV-1-infected cell lines ED-40515(-) and MT-2 and in the positive-control cell  
6 line (HOP-62). The chromosomal region (Chr14: 90422126-90422782) was sequenced.  
7 Non-methylated CpG dinucleotides are represented by white circles, and methyl-CpG  
8 dinucleotides by black circles.

9

10

11

12

13

14

15

16

17

18

19

20

21

## Supplementary Figure S2

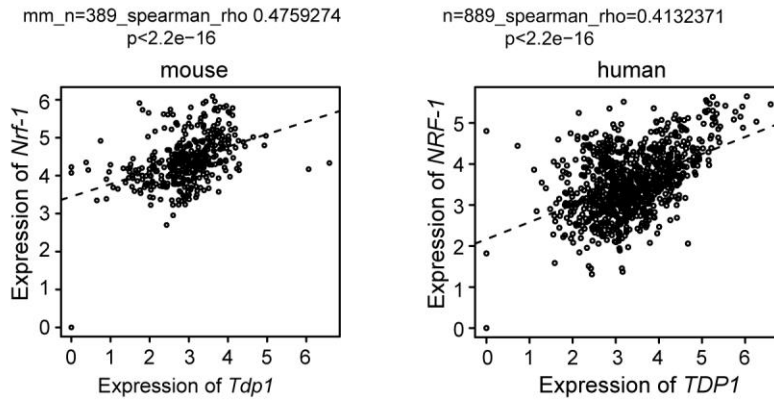

1

2

3

4

5

6

7

8

9

10

11

12

13

14

15

16

17

18

19

Supplementary Figure S2. Correlation between the gene expression levels of *TDP1*(*Tdp1*) and *NRF-1*(*Nrf-1*) across 889 human (right) and 389 mouse (left) samples was analyzed in the FANTOM5 Phase 1 data (mouse: Spearman rho 0.476,  $P < 0.0001$ ; human: Spearman rho 0.413,  $P < 0.0001$ ).

### Supplementary Figure S3

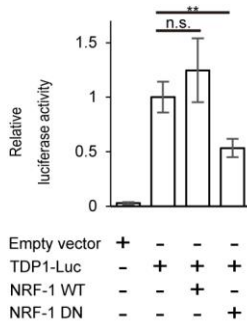

1

2 Supplementary Figure S3. Effects of NRF-1 and its mutants on the luciferase activity of  
 3 the *TDP1* promoter. 5  $\mu\text{g}$  of TDP1-Luc (-126/+193) was transfected by electroporation  
 4 into  $1 \times 10^7$  Jurkat T cells with or without vectors expressing wild-type (WT) (1.5  $\mu\text{g}$ )  
 5 or dominant-negative mutant (DN) (0.5  $\mu\text{g}$ ) of NRF-1. Relative luciferase activity was  
 6 calculated by comparison with the basal luciferase activity of TDP1-Luc. Data shown  
 7 are the mean  $\pm$  SD ( $n = 3$ ).

8

9

10

11

12

### Supplementary Figure S4

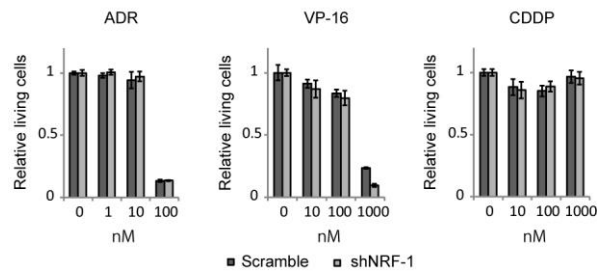

1

2 Supplementary Figure S4. Viability of shNRF-1 transfected Jurkat T cells after 48 h  
3 treatment with the indicated dose of adriamycin (ADR), etoposide (VP-16) and cisplatin  
4 (CDDP). MTS values of treated cells relative to untreated cells are shown. Data shown  
5 are the mean  $\pm$  SD ( $n = 3$ ).

## Supplementary Figure S5

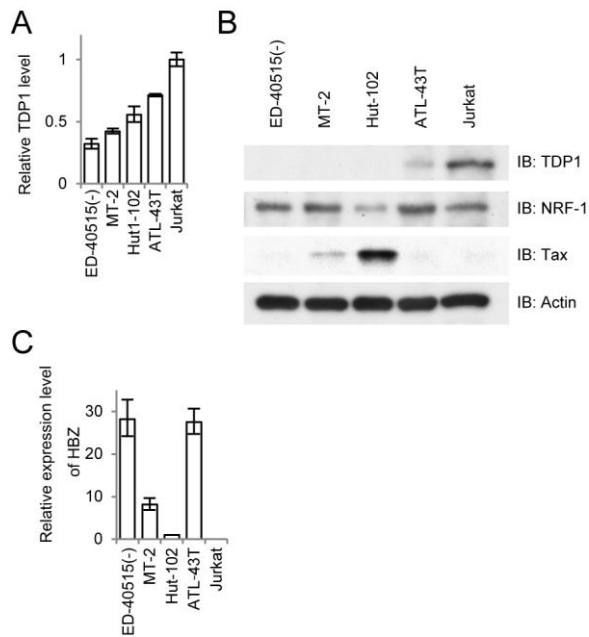

1

2 Supplementary Figure S5. Comparison of *TDP1* gene expression in HTLV-1-infected  
 3 cell lines. (A) Comparison of *TDP1* mRNA expression in HTLV-1-infected cell lines by  
 4 real-time PCR. Data shown are the mean  $\pm$  SD ( $n = 3$ ). (B) Comparison of TDP1, NRF-  
 5 1, and Tax protein expression in HTLV-1-infected cell lines by immunoblotting. (C)  
 6 Comparison of *HBZ* mRNA expression in HTLV-1-infected cell lines by real-time PCR.  
 7 Data shown are the mean  $\pm$  SD ( $n = 3$ ).

## Supplementary Figure S6

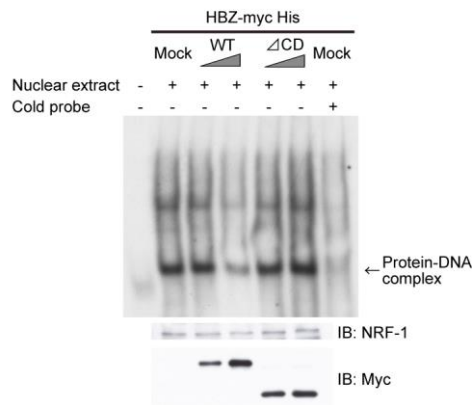

1

2 Supplementary Figure S6. HBZ reduces NRF-1 binding to the NRF-1 binding motif in  
 3 the TDP1 promoter through the central domain (CD). A gel-shift assay was performed  
 4 to analyze protein-DNA interactions. HEK293T cells were transfected with increasing  
 5 amounts of HBZ wild-type (WT) and HBZ- $\Delta$ CD. Expression of the NRF-1 and HBZ  
 6 (WT and  $\Delta$ CD) proteins contained in the nuclear extracts were analyzed by  
 7 immunoblotting. The positions of the protein-DNA complexes are indicated by the  
 8 arrow.

### Supplementary Figure S7

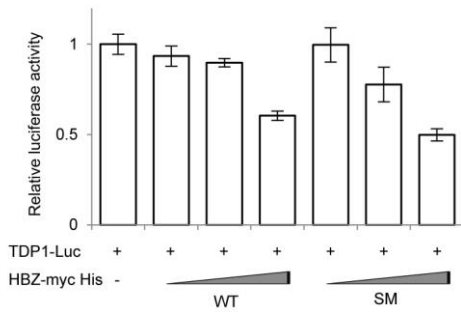

1

2 Supplementary Figure S7. Effects of *HBZ* and its mutants on *TDP1* promoter activity.

3 Luciferase reporter (TDP1-Luc) was transfected into HEK293T cells with or without

4 vectors expressing wild-type (WT) or mutated *HBZ* (SM) (0.05, 0.1, or 0.2  $\mu$ g). Relative

5 luciferase activities were calculated in comparison with the basal luciferase activity of

6 TDP1-Luc. Data shown are the mean  $\pm$  SD ( $n = 3$ ).
